# Supplementary material
Source: PubMed Central journal article supplement (PMC4790731)
Supplement: NIHMS763812-supplement-02.pdf [file NIHMS763812-supplement-02.pdf]

Bu20a or ICR1 antibodies. The levels of *MYC*, *ACTB* and *GAPDH* NRO-RNAs were determined by RT-qPCR. Values are mean + SEM,  $n=3$ .

**Supplementary Figure 5: RT-qPCR primer binding locations for *MYC*, *ACTB*, *GAPDH* and *GUSB*.**

*In silico* PCR was used to map RT-qPCR primer sequences (indicated by black brackets) to the human genome (hg19) for (a) *MYC*, (b) *ACTB*, (c) *GAPDH*, and (d) *GUSB*.

**Supplementary Table 1: Additional primers used in this study.**

**Supplementary File 1: Additional validation data for NRO-RT-qPCR reference genes.**

**Supplementary Methods**
